# Supplementary material for: Feasibility and Acceptability of a Mental Health Website for Adults With an Intellectual Disability: Qualitative Evaluation
Source: PubMed Central journal article supplement (PMC6458530; doi:10.2196/12958), 2019-03-28
Supplement: mental_v6i3e12958_app1.pdf [file mental_v6i3e12958_app1.pdf]

# Black Dog Institute

## Healthy Mind - an Easy Read tool for building good mental health

Creating a mentally healthier world

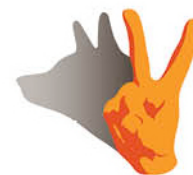

**Black Dog**  
Institute

## Healthy Mind is an online Easy Read tool for building good mental health

[Start an Activity](#)

### Healthy Mind can help you feel better if you've felt

- worried for a long time
- stressed for long time
- angry for a long time
- sad for a long time

Healthy Mind will teach you how to think in ways that are  
helpful for having a good life

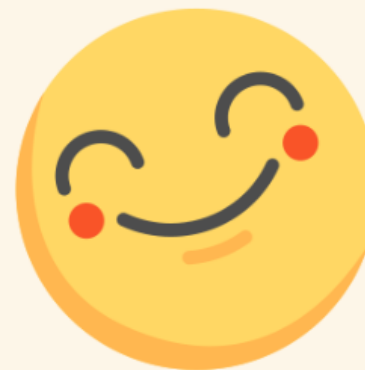

# Activities

## Start your activity

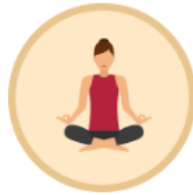

Relax, breathe easy

Start This Activity

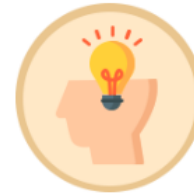

Tackling Unhelpful Thinking

Start This Activity

Creating a mentally healthier world

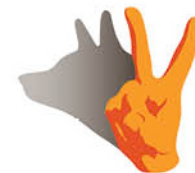

**Black Dog**  
Institute

# Activities

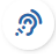

What does it mean to be relaxed?

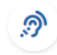

Being relaxed means that you stop feeling stressed or worried.

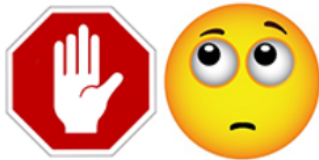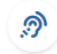

It means you can think about happy things.

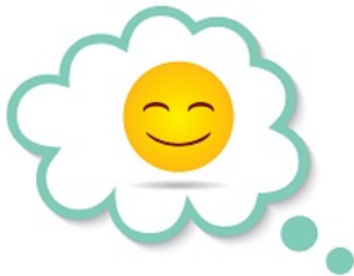

Creating a mentally healthier world

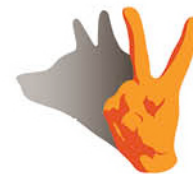

**Black Dog  
Institute**

# Tracking progress

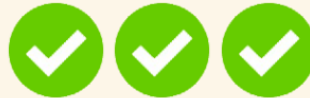

You've completed

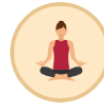

## Relax, breathe easy

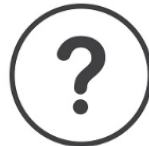

Part 1 of 6: About the program

Would you like to do this part again?

Download and print this part 

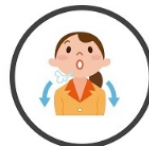

Part 2 of 6: Deep breathing

Would you like to do this part again?

Download and print this part 

Creating a mentally healthier world

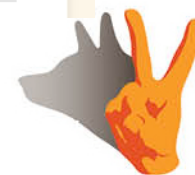

**Black Dog  
Institute**

# Videos

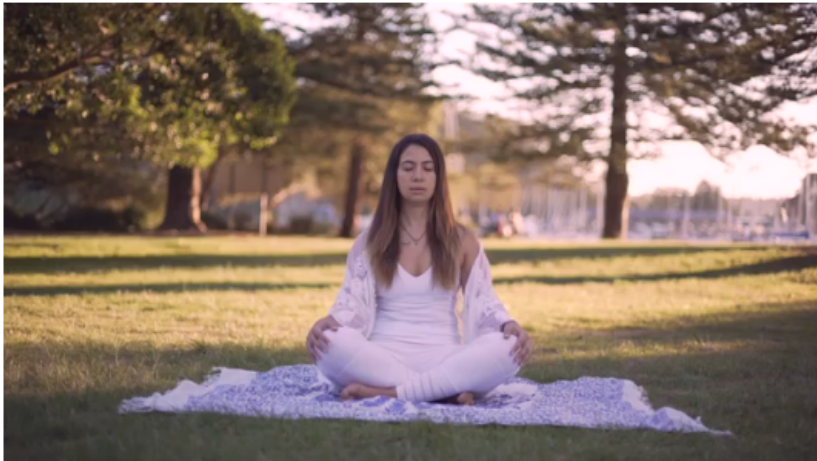

How to deep breathe

What is an unhelpful thought?

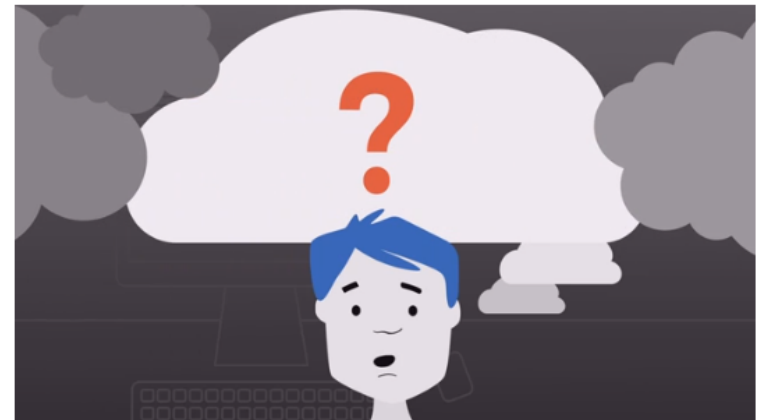

**Creating a mentally healthier world**

# Log in

What is your first name?

What month and year were you born in?

 

Please select one of the following:

Please select a security question

What's this for? We will ask you this question if you forget your password

Creating a mentally healthier world

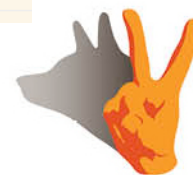

**Black Dog**  
Institute

# Black Dog Institute

[www.blackdoginstitute.org.au](http://www.blackdoginstitute.org.au)

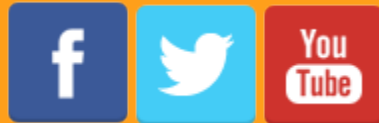

[/blackdoginst](#)

Creating a mentally healthier world

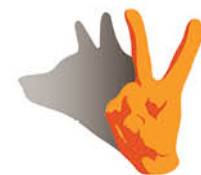

**Black Dog  
Institute**
